# Supplementary material for: Pyrazinyl-functionalized Zr(iv)-MOF for ultrasensitive detection of tyrosine/TNP and efficient CO2/N2 separation
Source: Royal Society of Chemistry journal article supplement (doi:10.1039/c9tc03096d), 2019-01-01
Supplement: c9tc03096d1.pdf [file c9tc03096d1.pdf]

## Supporting information

### **Pyrazinyl-functionalized Zr(IV)-MOF for ultrasensitive detection of tyrosine/TNP and efficient CO<sub>2</sub>/N<sub>2</sub> separation**

Jin-Min Liu<sup>†a,b</sup>, Jin-Xin Hou<sup>†a,b</sup>, Jie Liu<sup>a,b</sup>, Xu Jing<sup>a</sup>, Li-Jun Li<sup>a,b</sup> and Jian-Long Du<sup>\*a,b</sup>

*<sup>a</sup>College of Chemistry & Environmental Science, and Key Laboratory of Chemical Biology of Hebei Province, Hebei University, Baoding 071002, P. R. China*

*<sup>b</sup>Key laboratory of Medicinal Chemistry and Molecular Diagnosis of Ministry of Education, Hebei University, Baoding 071002, P. R. China*

---

<sup>†</sup>These authors contributed equally to this article.

\* Corresponding author. E-mail: dujl@hbu.cn (J.-L. Du).

## X-ray data collection

The crystallographic data of **HBU-18** was collected by a Bruker SMART APEX CCD diffractometer using graphite-monochromated Mo-K $\alpha$  radiation ( $\lambda = 0.71073 \text{ \AA}$ ). Data integrating and scaling were conducted by SAINT and SADABS programs. The structure was solved by the direct method (SHELX-2017).<sup>S1</sup> PLANTION SQUEEZE program was used to remove free solvent molecules. The molecular formula was corrected based on element and thermogravimetric analysis. Crystallographic data was displayed in Table S1 and S2. The CCDC reference number for **HBU-18** is 1919374.

**Table S1.** Crystal data and structure refinements for **HBU-18**.

|                                                                          | <b>HBU-18</b>                                                                  | <b>After treated by<br/>acid (pH= 1)</b> | <b>After treated by<br/>base (pH= 11)</b> |
|--------------------------------------------------------------------------|--------------------------------------------------------------------------------|------------------------------------------|-------------------------------------------|
| Empirical Formula                                                        | C <sub>32</sub> H <sub>24</sub> N <sub>2</sub> O <sub>16</sub> Zr <sub>3</sub> |                                          |                                           |
| Formula weight                                                           | 966.13                                                                         |                                          |                                           |
| Crystal system                                                           | Tetragonal                                                                     | Tetragonal                               | Tetragonal                                |
| Space group                                                              | <i>I4(1)/amd</i>                                                               |                                          |                                           |
| <i>a</i> (Å)                                                             | 15.1821(7)                                                                     | 15.14                                    | 15.16                                     |
| <i>b</i> (Å)                                                             | 15.1821(7)                                                                     | 15.14                                    | 15.16                                     |
| <i>c</i> (Å)                                                             | 60.416(6)                                                                      | 60.47                                    | 60.76                                     |
| $\alpha$ (°)                                                             | 90                                                                             | 90                                       | 90                                        |
| $\beta$ (°)                                                              | 90                                                                             | 90                                       | 90                                        |
| $\gamma$ (°)                                                             | 90                                                                             | 90                                       | 90                                        |
| Volume (Å <sup>3</sup> )                                                 | 13925.7(19)                                                                    | 13861                                    | 13962                                     |
| <i>Z</i>                                                                 | 8                                                                              |                                          |                                           |
| <i>D</i> calc (g cm <sup>-3</sup> )                                      | 0.914                                                                          |                                          |                                           |
| $\mu$ (mm <sup>-1</sup> )                                                | 0.480                                                                          |                                          |                                           |
| F(000)                                                                   | 3760                                                                           |                                          |                                           |
| R <sub>1</sub> <sup>a</sup> / wR <sub>2</sub> <sup>b</sup> [I>2sigma(I)] | 0.0778/0.2542                                                                  |                                          |                                           |
| R <sub>1</sub> <sup>a</sup> / wR <sub>2</sub> <sup>b</sup> (all data)    | 0.1424/0.2898                                                                  |                                          |                                           |
| GOF on <i>F</i> <sup>2</sup>                                             | 1.002                                                                          |                                          |                                           |

<sup>a</sup>R<sub>1</sub> =  $\Sigma(|F_0| - |F_c|) / \Sigma|F_0|$ , <sup>b</sup>wR<sub>2</sub> =  $[\Sigma w(|F_0|^2 - |F_c|^2)^2 / \Sigma w(F_0^2)]^{1/2}$ .

**Table S2.** Selected bond distances (Å) and bond angles (°) in **HBU-18**.

|                                |            |                                 |           |
|--------------------------------|------------|---------------------------------|-----------|
| Zr(1)-O(3)                     | 2.075(4)   | Zr(1)-O(1W)                     | 2.221(8)  |
| Zr(1)-O(4)                     | 2.242(4)   | Zr(1)-O(1)                      | 2.245(6)  |
| Zr(2)-O(3)                     | 2.044(7)   | Zr(2)-O(2)                      | 2.208(5)  |
| Zr(2)-O(4)                     | 2.324(8)   |                                 |           |
| O(3) <sup>#1</sup> -Zr(1)-O(3) | 91.5(4)    | O(3) <sup>#1</sup> -Zr(1)-O(1W) | 144.8(2)  |
| O(3)-Zr(1)-O(1W)               | 95.1(3)    | O(1W)-Zr(1)-O(1W) <sup>#2</sup> | 99.1(5)   |
| O(3) <sup>#1</sup> -Zr(1)-O(4) | 69.9(2)    | O(3)-Zr(1)-O(4)                 | 72.0(3)   |
| O(1W)-Zr(1)-O(4)               | 144.7(2)   | O(1W) <sup>#2</sup> -Zr(1)-O(4) | 78.0(3)   |
| O(4)-Zr(1)-O(4) <sup>#3</sup>  | 124.1(4)   | O(3)-Zr(1)-O(1) <sup>#2</sup>   | 142.9(2)  |
| O(4)-Zr(1)-O(1) <sup>#2</sup>  | 134.3(3)   | O(3)-Zr(1)-O(1)                 | 79.1(3)   |
| O(1W)-Zr(1)-O(1)               | 72.2(3)    | O(1W) <sup>#2</sup> -Zr(1)-O(1) | 74.9(3)   |
| O(4)-Zr(1)-O(1)                | 73.1(2)    | O(1) <sup>#2</sup> -Zr(1)-O(1)  | 128.3(3)  |
| O(3)-Zr(2)-O(3) <sup>#4</sup>  | 92.8(4)    | O(3)-Zr(2)-O(2)                 | 84.8(2)   |
| O(3) <sup>#4</sup> -Zr(2)-O(2) | 143.11(17) | O(2)-Zr(2)-O(2) <sup>#4</sup>   | 118.2(3)  |
| O(2)-Zr(2)-O(2) <sup>#5</sup>  | 73.5(3)    | O(2)-Zr(2)-O(2) <sup>#6</sup>   | 75.9(3)   |
| O(2)-Zr(2)-O(4) <sup>#4</sup>  | 140.43(16) | O(3)-Zr(2)-O(4)                 | 70.79(14) |
| O(2)-Zr(2)-O(4)                | 73.7(2)    | O(4) <sup>#4</sup> -Zr(2)-O(4)  | 123.0(4)  |

Symmetry codes: #1  $y+3/4, -x+5/4, -z+3/4$ ; #2  $y+3/4, x-3/4, -z+3/4$ ; #3  $-y+5/4, x-3/4, -z+3/4$ ; #4  $-x+2, -y+1/2, z$ ; #5  $-x+2, y, z$ ; #6  $x, -y+1/2, z$ .

### Detection limit (LOD) calculation

For calculating detection limit, TNP ( $10^{-4}$  M, stock solution) was added to probe (guest-free) ( $0.20 \text{ mg}\cdot\text{mL}^{-1}$ ) and fluorescent intensities were recorded. By plotting fluorescence intensity ( $I_0-I$ ) with increasing concentration of nitro-explosives (mM), slope ( $m$ ) was calculated from the graph. Standard deviation ( $\sigma$ ) was calculated from four blank measurements of the probe. Detection limit is calculated based on the formula: ( $3\sigma/m$ ).

**Table S3.** The calculated limit of detection (LOD) for Tyr and TNP.

| Blank readings                  | Fluorescence intensity                     |
|---------------------------------|--------------------------------------------|
| 1-4                             | 1065509.3, 1066326.0, 1066635.7, 1067099.9 |
| 5-8                             | 1067288.1, 1067322.3, 1067618.9, 1067764.7 |
| Standard deviation ( $\sigma$ ) | 751.2                                      |
| Slope ( $m$ ) (FigS6 / S10)     | 23960.9 (Tyr) / 368303 (TNP)               |
| Detection limit ( $3\sigma/m$ ) | <b>94 nM (Tyr) / 6.2 nM (TNP)</b>          |

**Table S4.** LUMO and HOMO energies of H<sub>4</sub>L and different amino acids.

|                  |                  |        |        |         |       |        |        |
|------------------|------------------|--------|--------|---------|-------|--------|--------|
| <b>Analytes</b>  | H <sub>4</sub> L | Ser    | Tyr    | Gly     | Trp   | Val    | Phe    |
| <b>LUMO / eV</b> | -2.87            | 0.147  | -0.017 | 0.214   | -0.35 | 0.212  | -0.085 |
| <b>HOMO / eV</b> | -6.68            | -6.49  | -5.75  | -6.61   | -5.49 | -6.64  | -6.51  |
| <b>Analytes</b>  | Pro              | Ala    | Thr    | Met     | Leu   | Ile    | His    |
| <b>LUMO / eV</b> | 0.135            | 0.14   | -0.29  | -0.097  | 0.102 | 0.145  | 0.16   |
| <b>HOMO / eV</b> | -6.36            | -6.46  | -6.58  | -5.86   | -6.68 | -6.47  | -5.80  |
| <b>Analytes</b>  | Lys              | Glu    | Cys    | Asp     | Gln   | Asn    | Arg    |
| <b>LUMO / eV</b> | 0.130            | -0.134 | -0.065 | -0.0027 | 0.020 | -0.007 | -0.064 |
| <b>HOMO / eV</b> | -6.17            | -6.64  | -6.88  | -6.37   | -6.46 | -6.42  | -5.68  |

**Table S5.** A summary of the MOFs for sensing of TNP.

| <b>MOF</b>                                                                                                           | <b>K<sub>SV</sub> (M<sup>-1</sup>)</b> | <b>LOD (M)</b>               | <b>Medium</b>         | <b>Ref.</b>      |
|----------------------------------------------------------------------------------------------------------------------|----------------------------------------|------------------------------|-----------------------|------------------|
| Zn <sub>2</sub> (H <sub>2</sub> L) <sub>2</sub> (Bpy) <sub>2</sub> (H <sub>2</sub> O) <sub>3</sub> ·H <sub>2</sub> O | 1.36 × 10 <sup>4</sup>                 | 4.9 × 10 <sup>-7</sup>       | H <sub>2</sub> O      | S2               |
| {[Cd <sub>1.5</sub> (TPO)(bipy) <sub>1.5</sub> ]·3H <sub>2</sub> O} <sub>2n</sub>                                    | 2.4 × 10 <sup>5</sup>                  | 6.5 × 10 <sup>-8</sup>       | H <sub>2</sub> O      | 17               |
| [Tb(1,3,5-BTC)]                                                                                                      | 3.41 × 10 <sup>4</sup>                 | 8.1 × 10 <sup>-8</sup>       | EtOH                  | S3               |
| Zr <sub>6</sub> O <sub>4</sub> (OH) <sub>4</sub> (L) <sub>6</sub> (UiO-67@N)                                         | 2.9 × 10 <sup>4</sup>                  | —                            | H <sub>2</sub> O      | S4               |
| [Zr <sub>6</sub> O <sub>4</sub> (OH) <sub>4</sub> (BTDB) <sub>6</sub> ]·8H <sub>2</sub> O                            | 2.49 × 10 <sup>4</sup>                 | 1.63 × 10 <sup>-6</sup>      | MeOH                  | S5               |
| Zr <sub>6</sub> O <sub>4</sub> (OH) <sub>4</sub> (L) <sub>6</sub>                                                    | 2.9 × 10 <sup>4</sup>                  | 2.6 × 10 <sup>-6</sup>       | H <sub>2</sub> O      | S6               |
| BUT-13                                                                                                               | 5.1 × 10 <sup>5</sup>                  | 4.37 × 10 <sup>-8</sup>      | H <sub>2</sub> O      | S7               |
| <b>HBU-18</b>                                                                                                        | <b>2.46 × 10<sup>7</sup></b>           | <b>6.2 × 10<sup>-9</sup></b> | <b>H<sub>2</sub>O</b> | <b>This work</b> |

**Table S6.** CO<sub>2</sub> uptakes of different MOFs.

| <b>MOFs</b>                                                                                           | <b>298 K (cm<sup>3</sup>·g<sup>-1</sup>)</b> | <b>Ref.</b>      |
|-------------------------------------------------------------------------------------------------------|----------------------------------------------|------------------|
| JUC-MOF57                                                                                             | 15                                           | S8               |
| Cu-Sp5                                                                                                | 24.8                                         | S9               |
| [Cd <sub>2</sub> (tdz) <sub>2</sub> (4,4'-bpy) <sub>2</sub> ]·6.5H <sub>2</sub> O                     | 29.12                                        | S10              |
| <b>HBU-18</b>                                                                                         | <b>30.58</b>                                 | <b>This work</b> |
| [Zr <sub>6</sub> O <sub>4</sub> (OH) <sub>8</sub> (H <sub>2</sub> O) <sub>4</sub> (BTEB) <sub>2</sub> | 42                                           | 31               |
| [Zn <sub>2</sub> (TCA)(BIB) <sub>2.5</sub> ]·(NO <sub>3</sub> )                                       | 48.4                                         | S11              |
| Cd-PTC                                                                                                | 58                                           | S12              |
| [ZnLi(PTCA)]                                                                                          | 60.9                                         | S13              |

**Table S7.**  $Q_{st}$  values of CO<sub>2</sub> adsorption for some reported MOFs.

| MOFs                                                                    | $Q_{st}$ (kJ/mol) | Ref.             |
|-------------------------------------------------------------------------|-------------------|------------------|
| UMCM-1                                                                  | 11.9              | S14              |
| MOF-5                                                                   | 16.5              | S15              |
| NU 1000                                                                 | 17                | S16              |
| SIFSIX-2-Cu                                                             | 21                | S17              |
| IITKGP-5                                                                | 22.6              | S18              |
| IITKGP-6                                                                | 23                | S19              |
| ZTF-1                                                                   | 25.4              | S20              |
| Cu-TPBTM                                                                | 26                | S21              |
| SIFSIX-1-Cu                                                             | 27                | S17              |
| PCN-88                                                                  | 27                | S22              |
| <b>HBU-18</b>                                                           | <b>27.89</b>      | <b>This work</b> |
| [Co <sub>2</sub> Cl <sub>2</sub> (bbta)]                                | 28                | S23              |
| [Cu(bc ppm)H <sub>2</sub> O]                                            | 29                | S24              |
| [Cu(Me-4pytrz-ia)]                                                      | 30                | S25              |
| {[Co <sub>2</sub> (4,4-bpy)(L)]·H <sub>2</sub> O·0.5(DMF)} <sub>n</sub> | 31.09             | S26              |
| ZnPC-2                                                                  | 32                | S27              |
| [Cu <sub>2</sub> (L)(H <sub>2</sub> O) <sub>2</sub> ]                   | 36.4              | S28              |

**Table S8.** Adsorption capacities of N<sub>2</sub> and CO<sub>2</sub>.

|                                                    | <b>HBU-18</b> | <b>HBU-18</b> treated by acid (pH = 1) for 24 h | <b>HBU-18</b> treated by base (pH = 11) for 24 h |
|----------------------------------------------------|---------------|-------------------------------------------------|--------------------------------------------------|
| 273 k N <sub>2</sub> uptakes / cm <sup>3</sup> /g  | 6.67          | 5.02                                            | 4.62                                             |
| 273 k CO <sub>2</sub> uptakes / cm <sup>3</sup> /g | 49.17         | 65.97                                           | 64.60                                            |
| 298 k N <sub>2</sub> uptakes / cm <sup>3</sup> /g  | 2.71          | 3.82                                            | 3.71                                             |
| 298 k CO <sub>2</sub> uptakes / cm <sup>3</sup> /g | 30.58         | 38.95                                           | 37.69                                            |

**Table S9.** Adsorption selectivity of reported MOFs for CO<sub>2</sub>/N<sub>2</sub> (15:85) at 298 K.

| MOFs          | CO <sub>2</sub> /N <sub>2</sub> | Ref.             |
|---------------|---------------------------------|------------------|
| SIFSIX-2-Cu   | 13.7                            | S29              |
| Cu-BTTri      | 21                              | S30              |
| JUC-141       | 27.6                            | S31              |
| TIFSIX-1-Cu   | 30                              | S32              |
| <b>HBU-18</b> | <b>41.79</b>                    | <b>This work</b> |
| ZIF-78        | 50.1 / 296K                     | S33              |
| Cu-TDPAT      | 57.8 / 296K                     | S34              |
| USTA-85a      | 62.5 / 296K                     | S35              |
| Bio-MOF-11    | 79.5 / 296K                     | S34              |

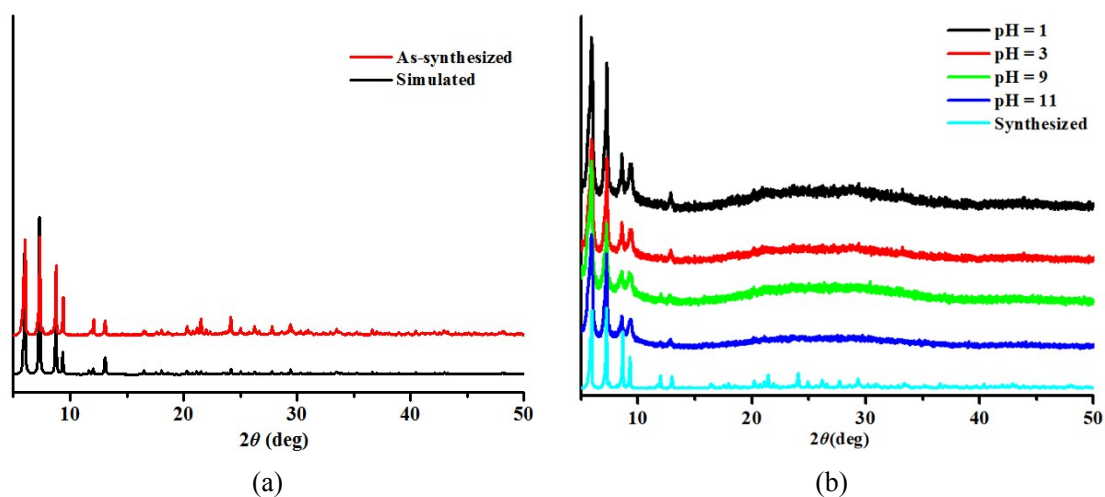

**Fig. S1** (a) PXRD patterns of **HBU-18**; (b) PXRD patterns of **HBU-18** after immersed in aqueous solution for 24 h.

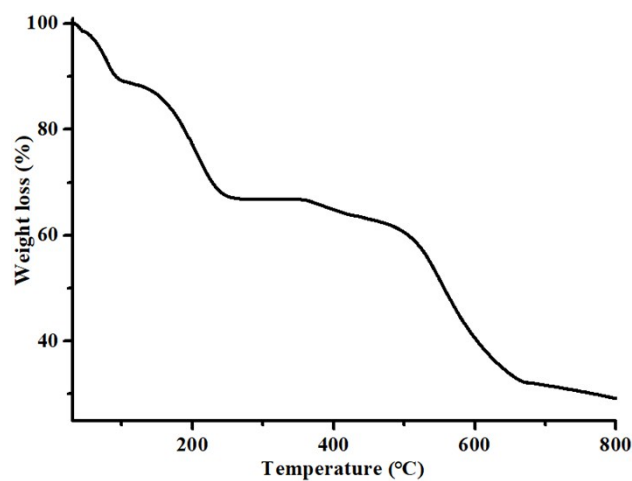

**Fig. S2** TG curve of **HBU-18**

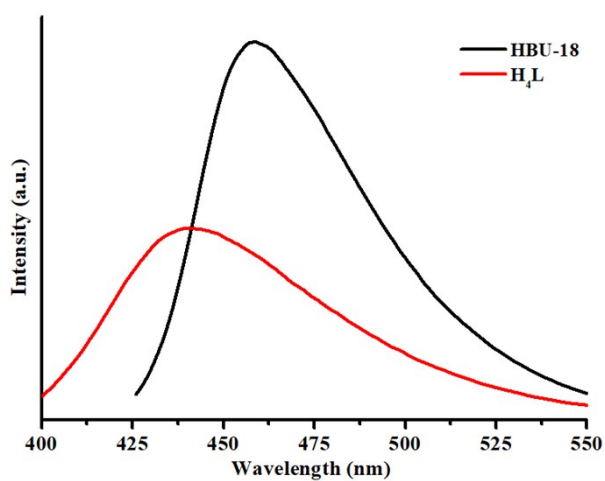

Fig. S3 Fluorescence spectra of H<sub>4</sub>L and HBU-18 in the solid state.

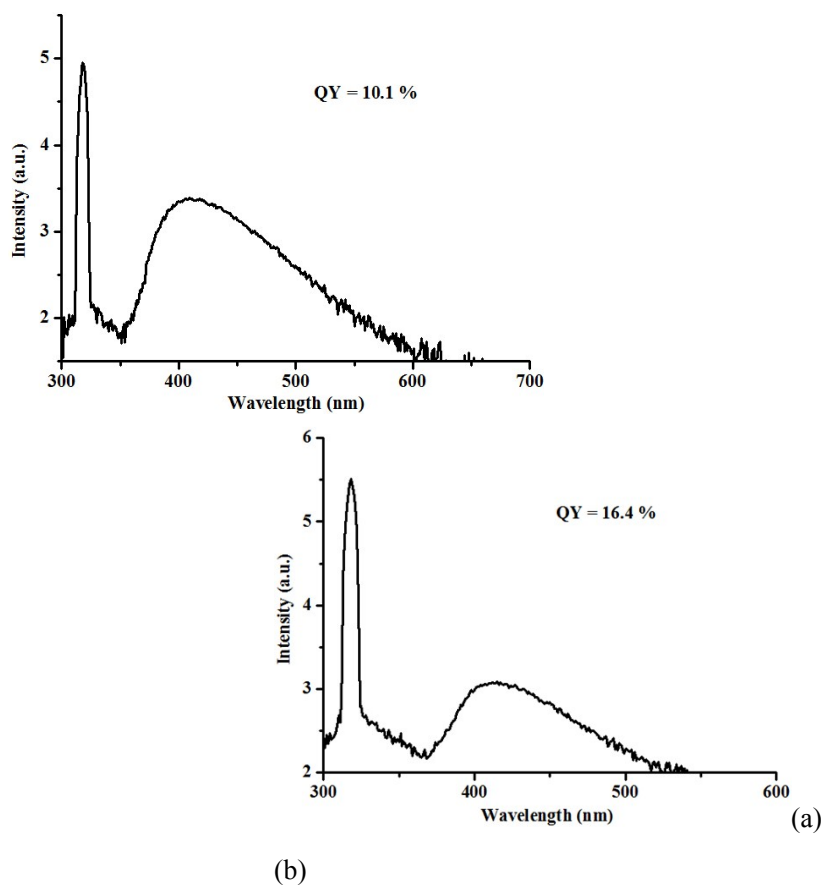

Fig. S4 Fluorescence quantum yield of H<sub>4</sub>L (a) and HBU-18 (b) in aqueous solution.

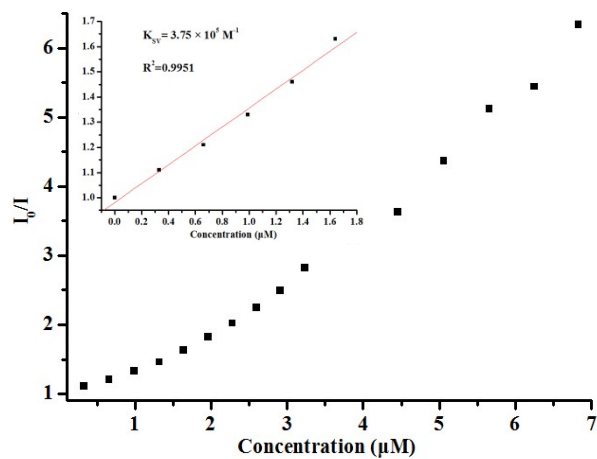

Fig. S5 Stern-Volmer (SV) plot of Tyr.

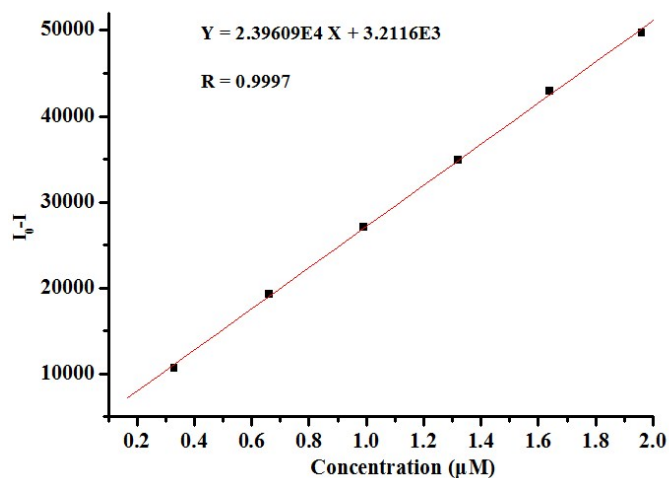

Fig. S6 Linear fitting between  $I_0 - I$  and the concentration of Tyr.

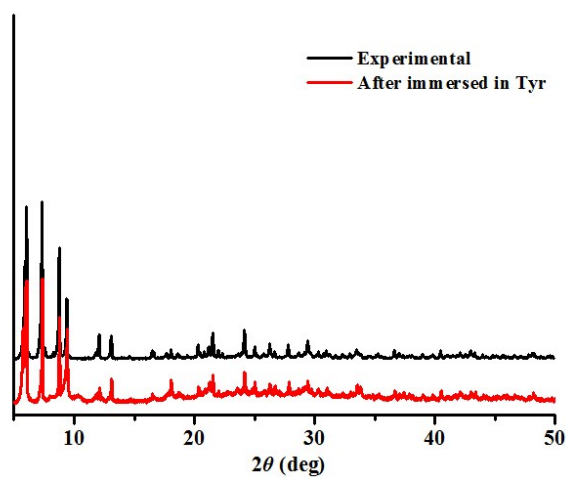

Fig. S7 PXRD patterns of HBU-18 before and after immersed in the solution of Tyr ( $10^{-4} \text{ M}$ ).



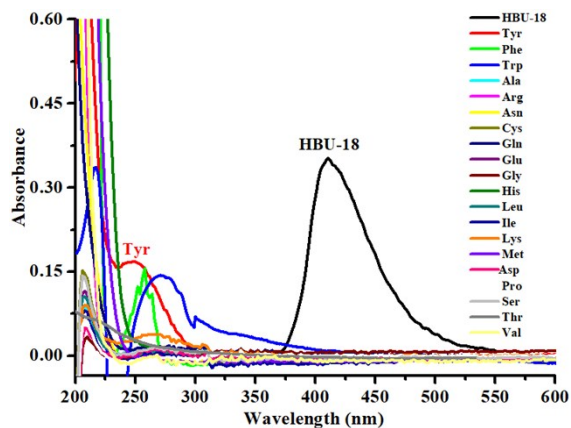

Fig. S8 UV-vis spectra of amino acids and emission spectrum of HBU-18.

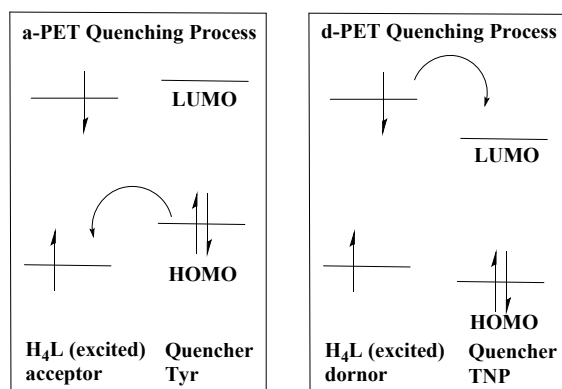

Fig. S9 a-PET and d-PET quenching process.

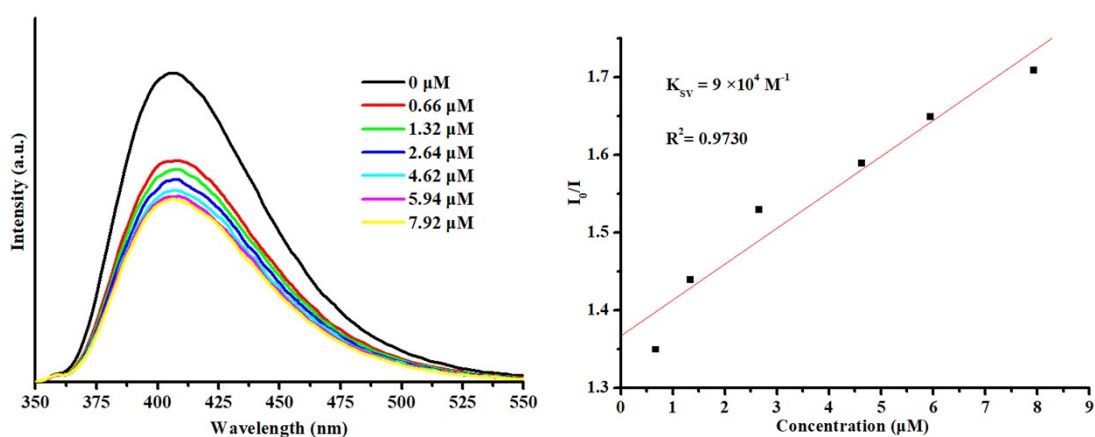

Fig. S10 Fluorescence detection of Tyr after HBU-18 immersed in acidic solution (pH = 1).

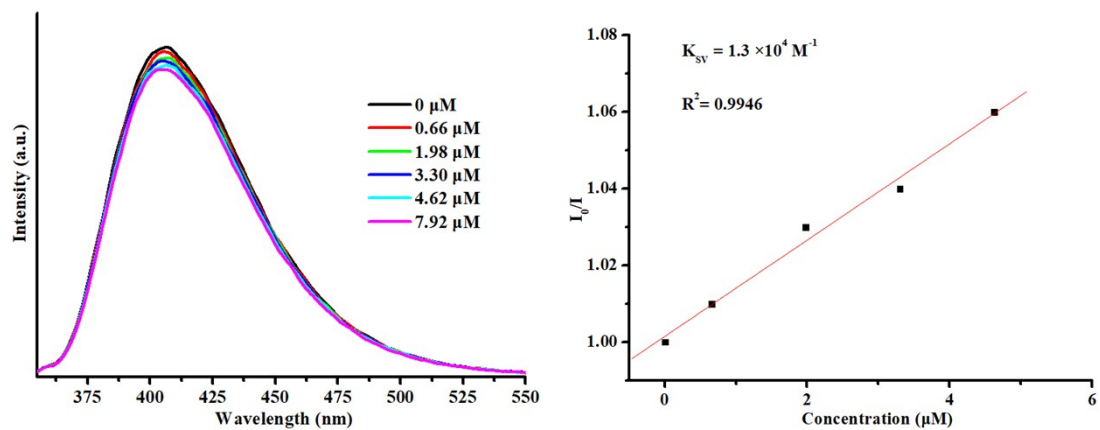

Fig. S11. Fluorescence detection of Tyr after HBU-18 immersed in basic solution (pH = 11).

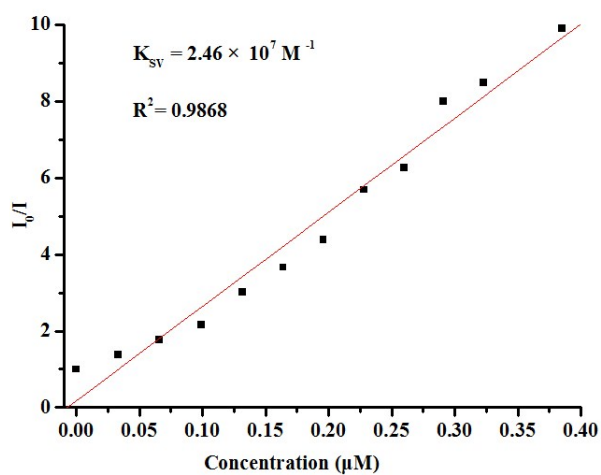

Fig. S12 Stern-Volmer (SV) curve after sensing of TNP.

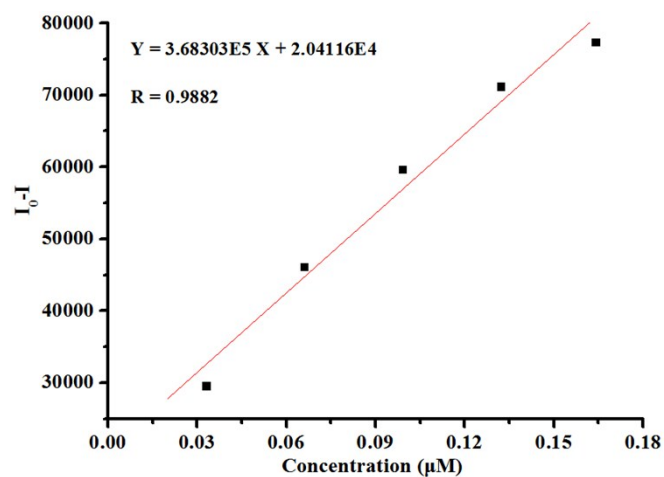

Fig. S13 Linear fitting between  $I_0 - I$  and the concentration of TNP.

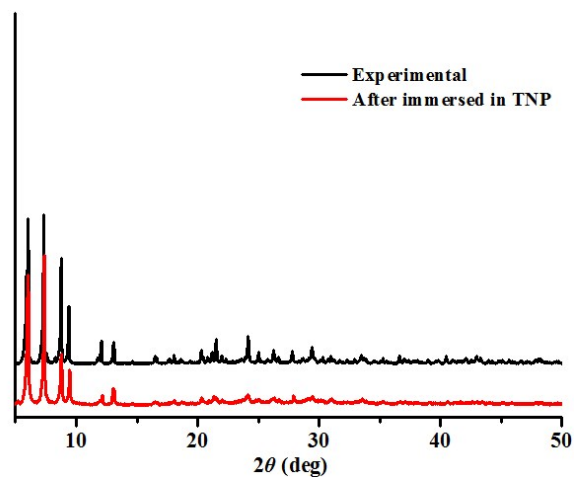

Fig. S14. PXRD patterns of **HBU-18** before and after immersed in the solution of TNP ( $10^{-5}$  M).

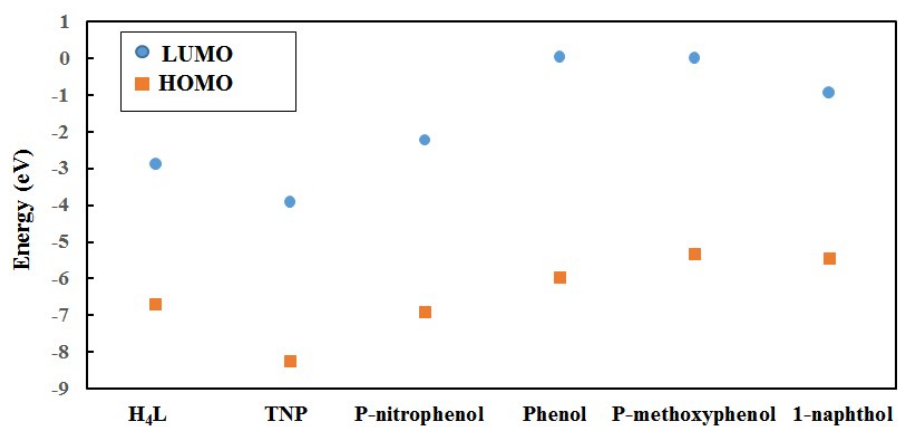

Fig. S15. LUMO and HOMO energy levels of H<sub>4</sub>L ligand and analytes.

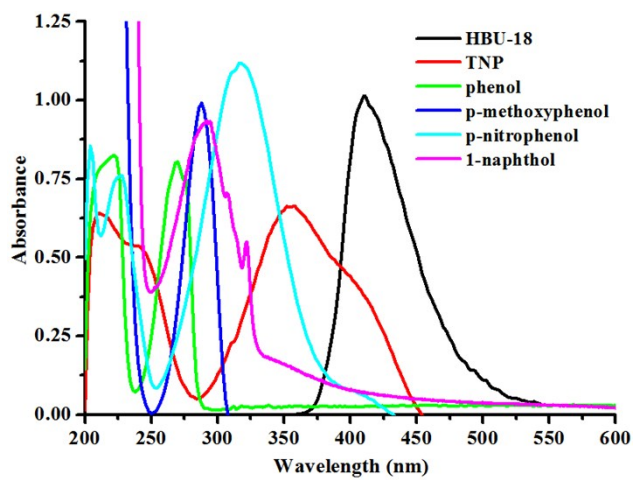

Fig. S16. UV-vis spectra of analytes and fluorescence spectrum of **HBU-18**.

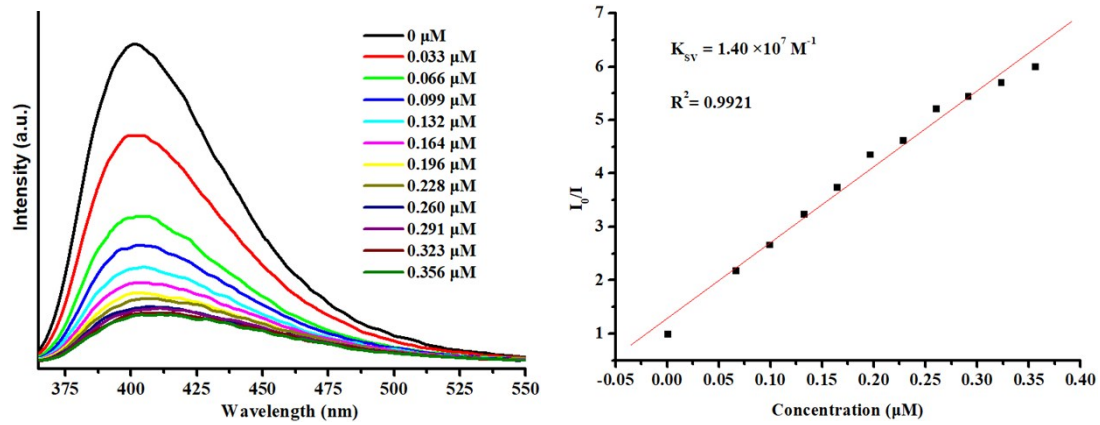

Fig. S17. Fluorescence detection of TNP after **HBU-18** immersed in acidic solution (pH = 1).

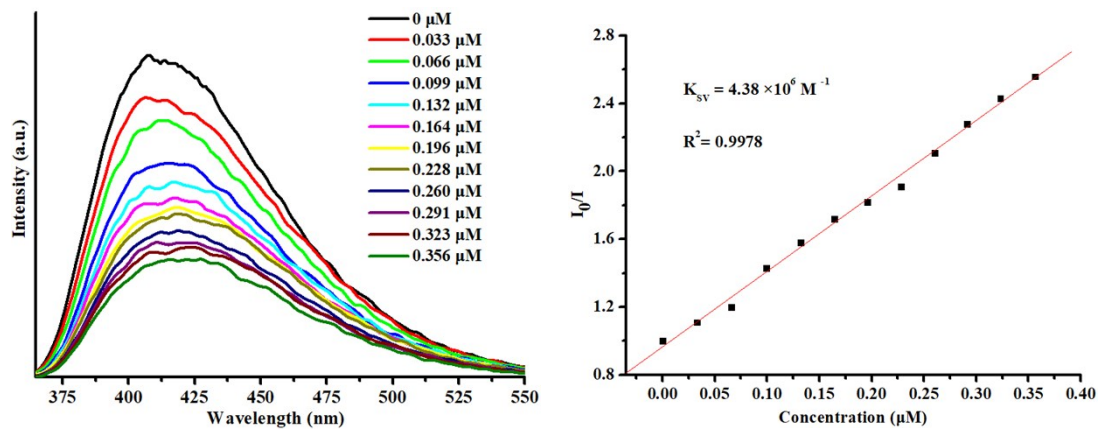

Fig. S18. Fluorescence detection of TNP after **HBU-18** immersed in basic solution (pH = 11).

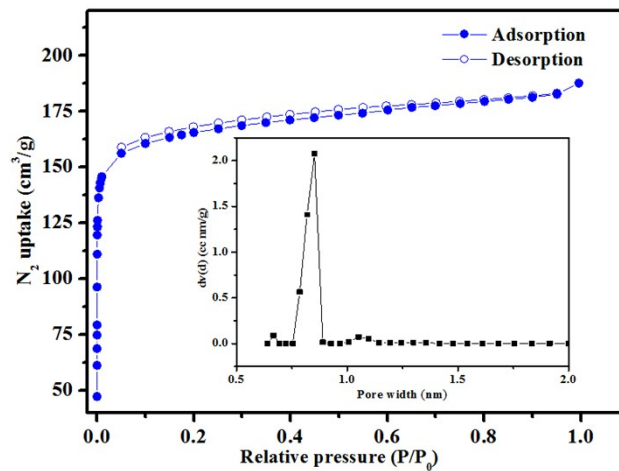

Fig. S19. N<sub>2</sub> adsorption-desorption isotherms of **HBU-18**.

### Calculation of sorption heat for CO<sub>2</sub> uptake using Virial 2 model

$$\ln P = \ln N + 1/T \sum_{i=0}^m a_i N^i + \sum_{i=0}^n b_i N^i$$

$$Q_{st} = -R \sum_{i=0}^m aiN^i$$

The above equation was applied to fit the combined CO<sub>2</sub> isotherm data for desolvated **HBU-18** at 273 and 298 K, where  $P$  is the pressure,  $N$  is the adsorbed amount,  $T$  is the temperature,  $ai$  and  $bi$  are virial coefficients, and  $m$  and  $n$  are the number of coefficients used to describe the isotherms.  $Q_{st}$  is the coverage-dependent enthalpy of adsorption and  $R$  is the universal gas constant.

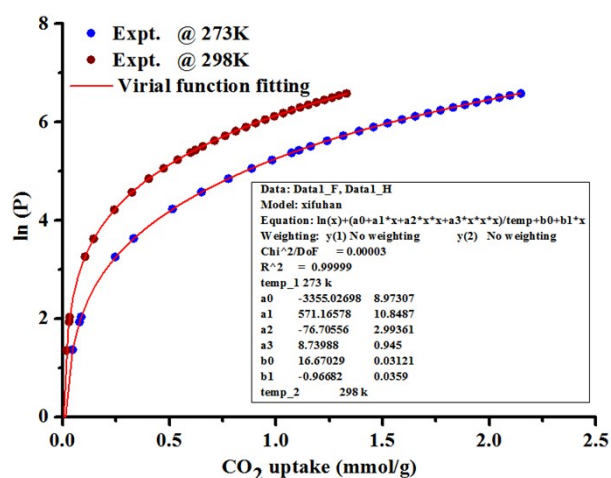

**Fig. S20.** CO<sub>2</sub> adsorption isotherms of **HBU-18** at 273 and 293 K fitted using the virial equation.

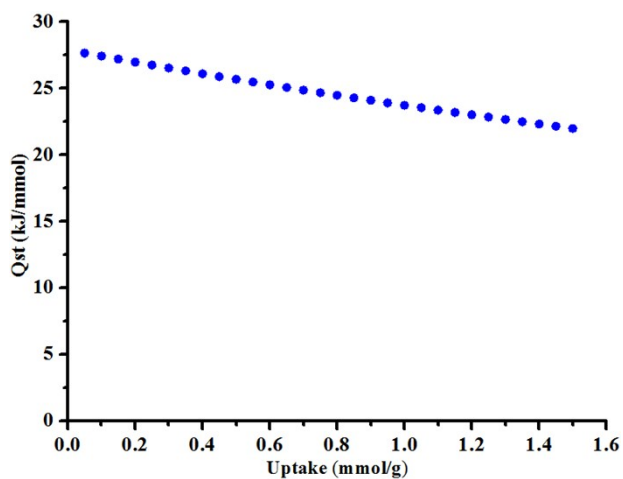

**Fig. S21.** Isothermic heat of CO<sub>2</sub> ( $Q_{st}$ ) for **HBU-18**.

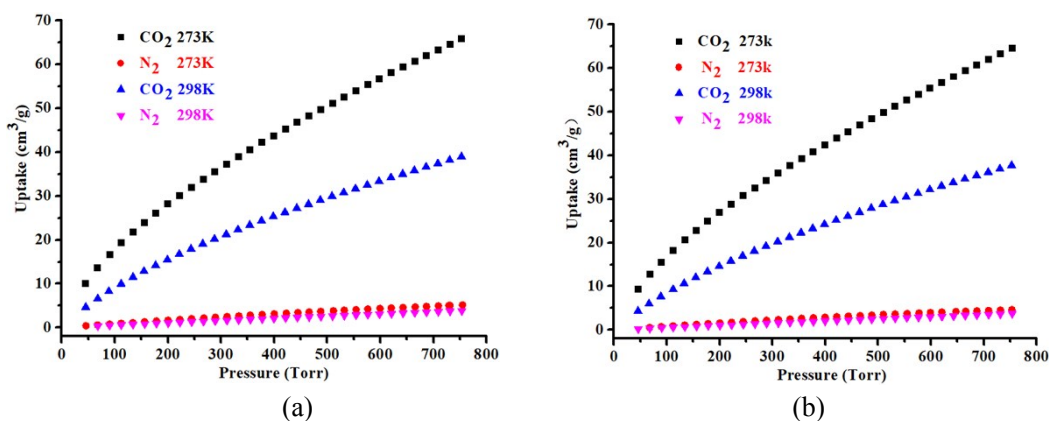

**Fig. S22.** CO<sub>2</sub> and N<sub>2</sub> adsorption isotherms at 298 K and 273 K: (a) activated by acid (pH = 1); (b) activated by base (pH = 11).

### Calculation of CO<sub>2</sub>/N<sub>2</sub> Selectivity (IAST Selectivity):

Adsorption isotherms and gas selectivities of mixed CO<sub>2</sub>/N<sub>2</sub> (5:95, 15:85, 25:75, 50:50) at different temperatures were calculated based on the ideal adsorbed solution theory (IAST) proposed. In order to calculate the selective sorption performance of **HBU-18** toward the separation of binary mixed gases, the parameters fitted from the single component CO<sub>2</sub> and N<sub>2</sub> adsorption isotherms based on the single-site Langmuir–Freundlich (SSLF) model and were used in the IAST calculations as given below in detail.

$$y = \frac{q * b * x^{1/t}}{1 + q * b * x^{1/t}}$$

Where  $x$  is the pressure of the bulk gas at equilibrium with the adsorbed phase (kPa);  $y$  is the adsorbed amount per mass of adsorbent (mmol/g);  $q$  is the saturation capacities of site 1 (mmol/g);  $b$  is the affinity coefficients of site 1 (1/kPa),  $t$  represent the deviations from an ideal homogeneous surface.

The predicted adsorption selectivity is defined as

$$S = (x_1/y_1)/(x_2/y_2)$$

here  $x_i$  and  $y_i$  are the mole fractions of component  $i$  ( $i = 1, 2$ ) in the adsorbed and bulk phases, respectively. The IAST calculations were carried out for a binary mixture containing 15% CO<sub>2</sub> ( $y_1$ ) and 85% N<sub>2</sub> ( $y_2$ ), which is typical of flue gases.

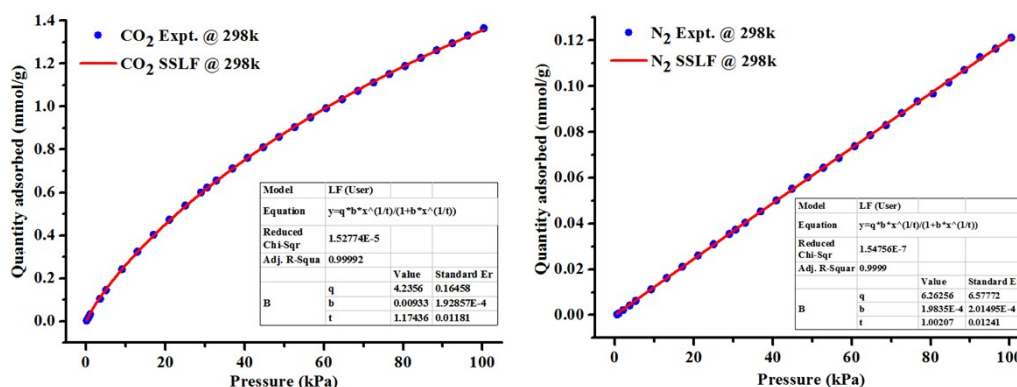

**Fig S23.** Single-site Langmuir-Freundlich fitting (red line) for CO<sub>2</sub> and N<sub>2</sub> (blue circle) isotherms.

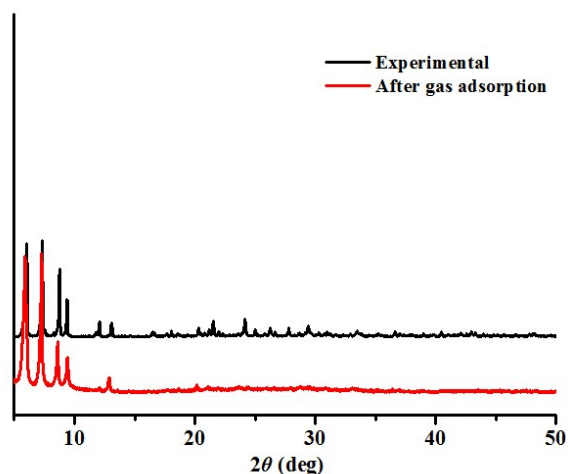

**Fig. S24.** PXRD patterns of HBU-18 before and after gas adsorption.

## References

- S1. G. M. Sheldrick, *Acta Cryst. C.*, 2015, **71**, 3-8.
- S2. Y. Deng, N. Chen, Q. Li, X. Wu, X. Huang, Z. Lin and Y. Zhao, *Cryst. Growth Des.*, 2017, **17**, 3170-3177.
- S3. J. D. Xiao, L. G. Qiu, F. Ke, Y. P. Yuan, G. S. Xu, Y. M. Wang and X. Jiang, *J. Mater. Chem. A*, 2013, **1**, 8745-8752.
- S4. S. S. Nagarkar, B. Joarder, A. K. Chaudhari, S. Mukherjee and S. K. Ghosh, *Angew. Chem. Int. Ed.*, 2013, **52**, 2881-2885.
- S5. M. SK and S. Biswas, *CrystEngComm*, 2016, **18**, 3104-3113.
- S6. S. S. Nagarkar, A. V. Desai and S. K. Ghosh, *Chem. Commun.*, 2014, **50**, 8915-8918.
- S7. B. Wang, X. L. Lv, D. W. Feng, L. H. Xie, J. Zhang, M. Li, Y. B. Xie, J. R. Li and H. C. Zhou, *J. Am. Chem. Soc.*, 2016, **138**, 6204-6216.
- S8. S. Liu, S. Yao, B. Liu, X. D. Sun, Y. Yuan, G. H. Li, L. R. Zhang and Y. L. Liu, *Dalton Trans.*, 2019, **48**, 1680-1685.
- S9. I. Kochetygov, S. Bulut, M. Asgari and W. L. Queen, *Dalton Trans.*, 2018, **47**, 10527-10535.
- S10. A. Gogia and S. K. Mandal, *Dalton Trans.*, 2019, **48**, 2388-2398.
- S11. C. Yao, S. Zhou, X. Kang, Y. Zhao, R. Yan, Y. Zhang and L. Wen, *Inorg. Chem.*, 2018, **57**, 11157-11164.
- S12. L. Hu, X.-J. Hong, X.-M. Lin, J. Lin, Q.-X. Cheng, B. Lokesh and Y.-P. Cai, *Cryst. Growth*

- Des.*, 2018, **18**, 7088-7093.
- S13. Y. L. Huang, D. C. Zhong, L. Jiang, Y. N. Gong and T. B. Lu, *Inorg. Chem.*, 2017, **56**, 705-708.
- S14. B. Mu, P. M. Schoenecker and K. S. Walton, *J. Phys. Chem. C*, 2010, **114**, 6464-6471.
- S15. J. S. Choi, W. J. Son, J. Kim and W. S. Ahn, *Micropor. Mesopor. Mat.*, 2008, **116**, 727-731.
- S16. P. Deria, J. E. Mondloch, E. Tylianakis, P. Ghosh, W. Bury, R. Q. Snurr, J. T. Hupp and O. K. Farha, *J. Am. Chem. Soc.*, 2013, **135**, 16801-16804.
- S17. S. D. Burd, S. Ma, J. A. Perman, B. J. Sikora, R. Q. Snurr, P. K. Thallapally, J. Tian, L. Wojtas and M. J. Zaworotko, *J. Am. Chem. Soc.*, 2012, **134**, 3663-3666.
- S18. A. Pal, S. Chand, S. M. Elahi and M. C. Das, *Dalton Trans.*, 2017, **46**, 15280-15286.
- S19. A. Pal, S. Chand and M. C. Das, *Inorg. Chem.*, 2017, **56**, 13991-13997.
- S20. T. Panda, P. Pachfule, Y. Chen, J. Jiang and R. Banerjee, *Chem. Commun.*, 2011, **47**, 2011-2013.
- S21. B. Zheng, J. Bai, J. Duan, L. Wojtas and M. J. Zaworotko, *J. Am. Chem. Soc.*, 2011, **133**, 748-751.
- S22. J.-R. Li, J. Yu, W. Lu, L.-B. Sun, J. Sculley, P. B. Balbuena and H.-C. Zhou, *Nat. Commun.*, 2012, **4**, 1538.
- S23. P.-Q. Liao, H. Chen, D. D. Zhou, S.-Y. Liu, C. T. He, Z. Rui, H. Ji, J.-P. Zhang and X.-M. Chen, *Energy Environ. Sci.*, 2015, **8**, 1011-1016.
- S24. W. M. Bloch, R. Babarao, M. R. Hill, C. J. Doonan and C. J. Sumby, *J. Am. Chem. Soc.*, 2013, **135**, 10441-10448.
- S25. D. Lässig, J. Lincke, J. Moellmer, C. Reichenbach, A. Moeller, R. Gläser, G. Kalies, K. A. Cychosz, M. Thommes, R. Staudt and H. Krautscheid, *Angew. Chem. Int. Ed.*, 2011, **50**, 10344-10348.
- S26. V. Gupta and S. K. Mandal, *Dalton Trans.*, 2019, **48**, 415-418.
- S27. Y. Ling, M. Deng, Z. Chen, B. Xia, X. Liu, Y. Yang, Y. Zhou and L. Weng, *Chem. Commun.*, 2013, **49**, 78-80.
- S28. C.-Y. Gao, H.-R. Tian, J. Ai, L.-J. Li, S. Dang, Y.-Q. Lan and Z.-M. Sun, *Chem. Commun.*, 2016, **52**, 11147-11150.



- S29. P. Nugent, Y. Belmabkhout, S. D. Burd, A. J. Cairns, R. Luebke, K. Forrest, T. Pham, S. Ma, B. Space, L. Wojtas, M. Eddaoudi and M. J. Zaworotko, *Nature*, 2013, **495**, 80-84.
- S30. A. Demessence, D. M. D'Alessandro, M. L. Foo and J. R. Long, *J. Am. Chem. Soc.*, 2009, **131**, 8784-8786.
- S31. N. Zhao, F. Sun, P. Li, X. Mu and G. Zhu, *Inorg. Chem.*, 2017, **56**, 6938-6942.
- S32. P. Nugent, V. Rhodus, T. Pham, B. Tudor, K. Forrest, L. Wojtas, B. Space and M. Zaworotko, *Chem. Commun.*, 2013, **49**, 1606-1608.
- S33. A. Phan, C. J. Doonan, F. J. Uribe-Romo, C. B. Knobler, M. O'Keeffe and O. M. Yaghi, *Acc Chem Res*, 2010, **43**, 58-67.
- S34. S. Xiang, Y. He, Z. Zhang, H. Wu, W. Zhou, R. Krishna and B. Chen, *Nat. Commun.*, 2012, **3**, 954.
- S35. O. Alduhaish, H. Wang, B. Li, H. D. Arman, V. Nesterov, K. Alfooty and B. Chen, *Chempluschem*, 2016, **81**, 764-769.
